# Supplementary material for: First Detection of Tetrodotoxin in Bivalves and Gastropods from the French Mainland Coasts
Source: PubMed Central journal article supplement (PMC7551754; doi:10.3390/toxins12090599), 2020-09-16
Supplement: toxins-12-00599-s001.pdf [file toxins-12-00599-s001.pdf]

## Supplementary Materials: First Detection of Tetrodotoxin in Bivalves and Gastropods from the French Mainland Coasts

Vincent Hort, Nathalie Arnich, Thierry Guérin, Gwenaëlle Lavison-Bompard and Marina Nicolas

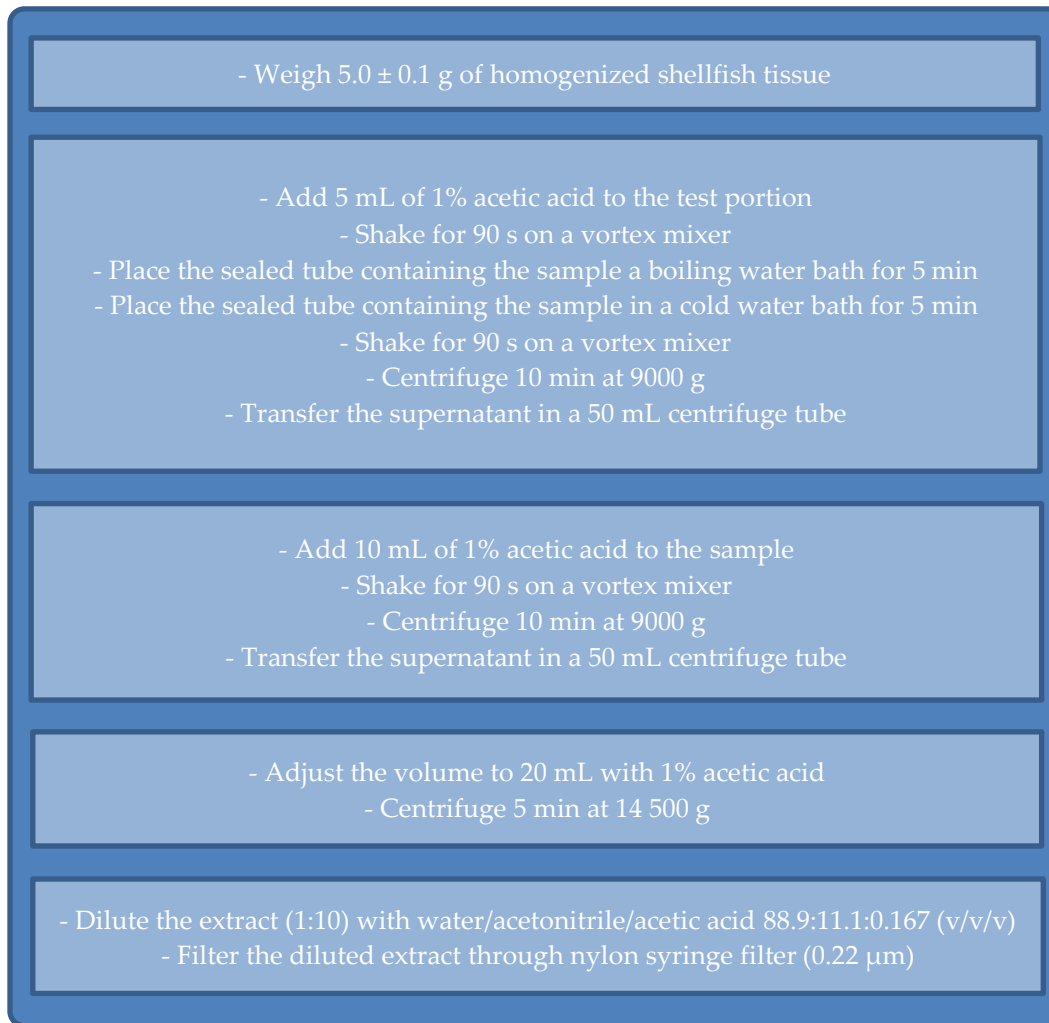

**Figure S1.** Double extraction of tetrodotoxins (TTXs) from homogenized shellfish tissues.

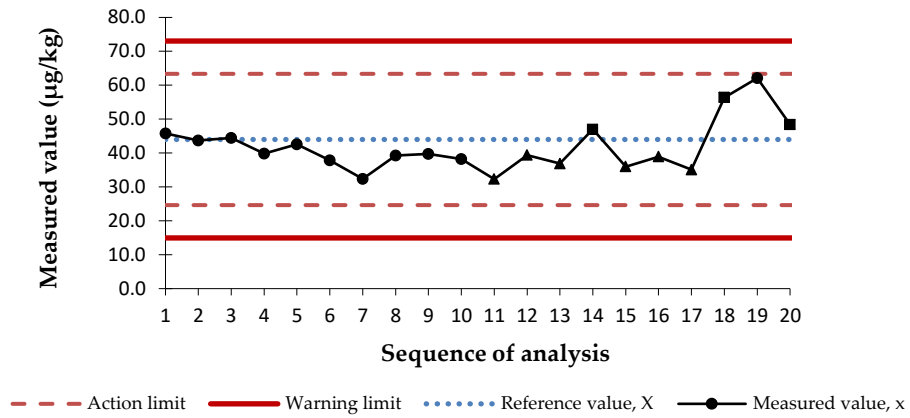

**Figure S2.** Control chart of blank matrices spiked at 44 µg TTX/kg and used as internal quality control (Round mark: mussel sample; triangle mark: whelk sample; square mark: oyster sample).
